# Supplementary material for: Impact of the three-fold channel substitution D131N on kinetics of translocation of Fe2+ across the protein coat is more severe for human cytosolic H-chain ferritin than for human mitochondrial ferritin
Source: Royal Society of Chemistry journal article supplement (doi:10.1039/d5dt02739j), 2026-04-01
Supplement: d5dt02739j1.pdf [file d5dt02739j1.pdf]

## Supplementary Information

**Impact of the three-fold channel substitution D131N on kinetics of translocation of Fe<sup>2+</sup> across the protein coat is more severe for human cytosolic H-chain ferritin than for human mitochondrial ferritin.**

Zinnia Bugg, Charlie Hazlewood, Andrew M. Hemmings, Justin M. Bradley and Nick E. Le Brun

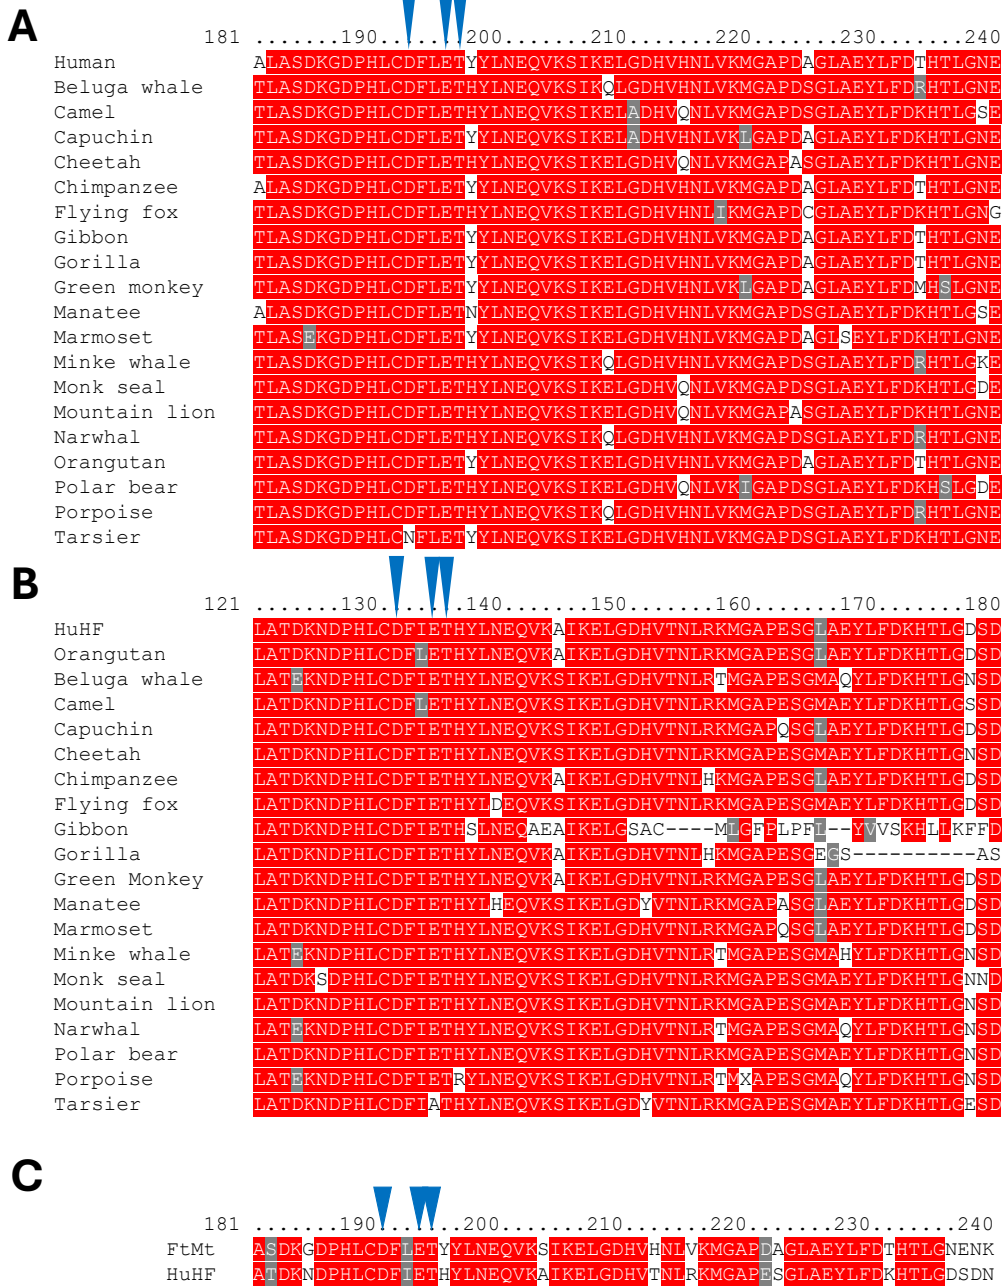

**Figure S1. Sequence alignments of cytosolic and mitochondrial ferritins.** Alignments of the peptide sequences of predicted mitochondrial (A) or cytosolic H-chain (B) ferritins from the organisms listed showing the region around the three-fold channel. A similar alignment between the mitochondrial & cytosolic H-chain ferritins of humans is shown in (C). Blue triangles mark the positions of residues observed to coordinate metal ions in structures derived from X-ray diffraction data.

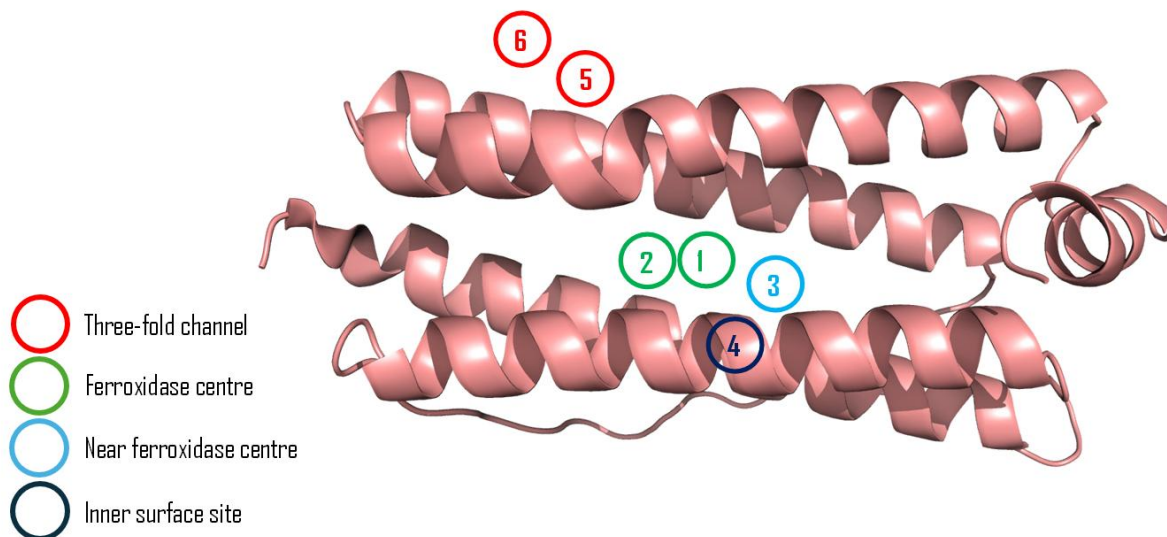

**Figure S2. Locations of metal binding sites 1-6 within the ferritin subunit.**

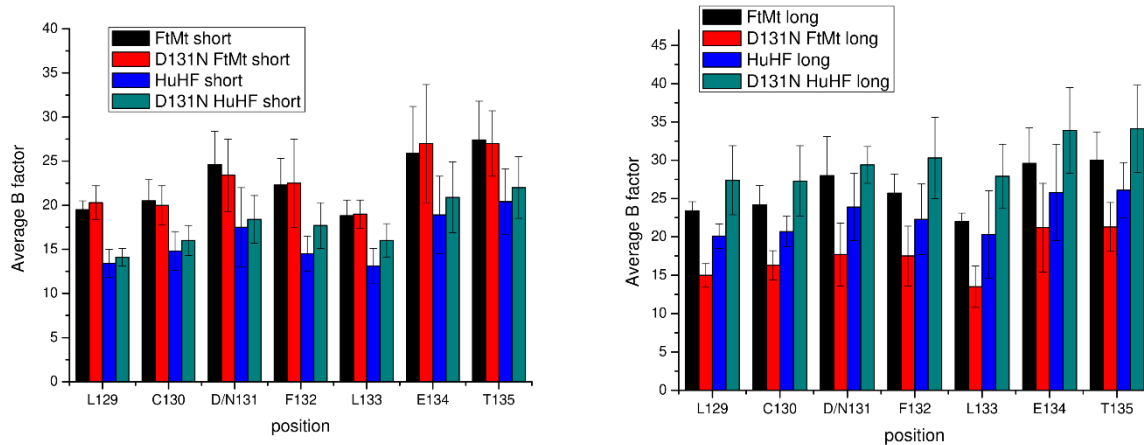

**Figure S3. Analyses of average B factors associated with three-fold channel residues in structures of HuHF, FtMt and D131N variants.**

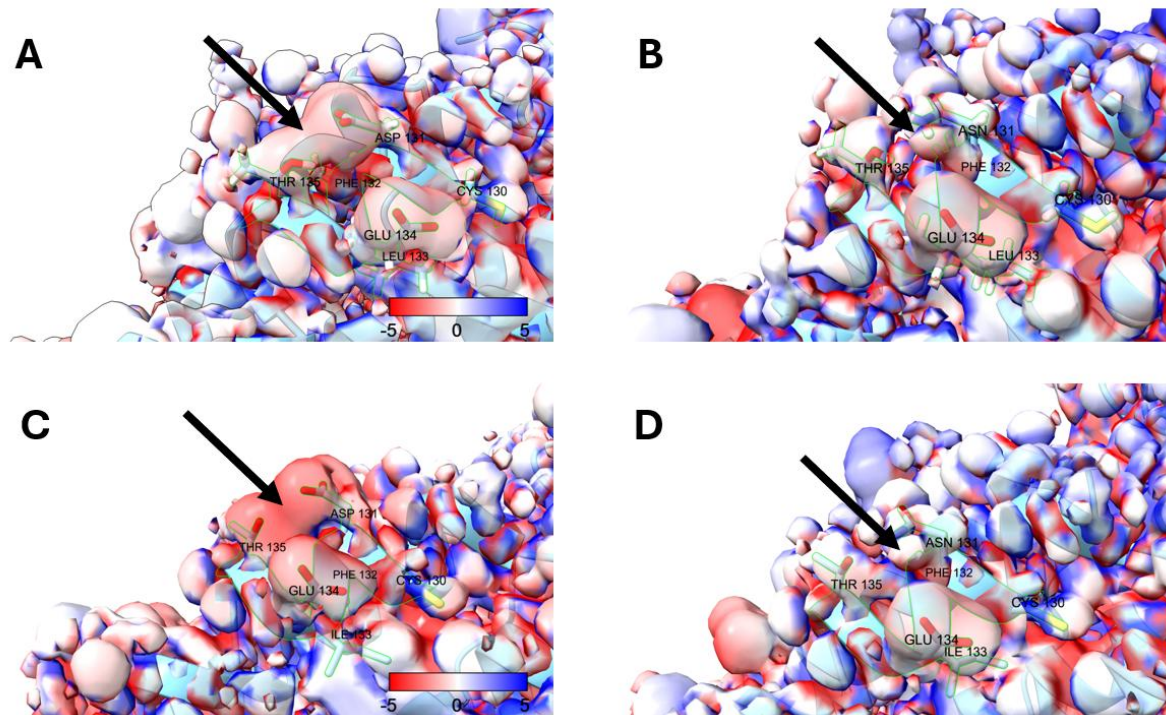

**Figure S4. Electrostatic potential surface calculations.** Electrostatic potential surfaces calculated for iron loaded FtMt (A), D131N FtMt (B), HuHF (C) and D131N HuHF (D) exposed to  $O_2$  for 5 min. All surfaces are rendered between the limits  $-5$  to  $+5 RTe_c^{-1}$  and maps coloured according to the key displayed in panels (A) and (C). Of note is that the negative potential in the region between residues 131 and 135 (highlighted by the black arrows) is greater for wild-type HuHF than for FtMt. This may arise from a slightly different conformation of Thr135 in wild-type HuHF compared to wild-type FtMt, resulting in greater negative electrostatic potential at the inner exit of the three-fold channel in the former. The electrostatic potential is abolished by D131N substitution in both proteins, but this is presumably of greater consequence in HuHF than in FtMt due to the magnitude of the negative potential that is lost being greater.

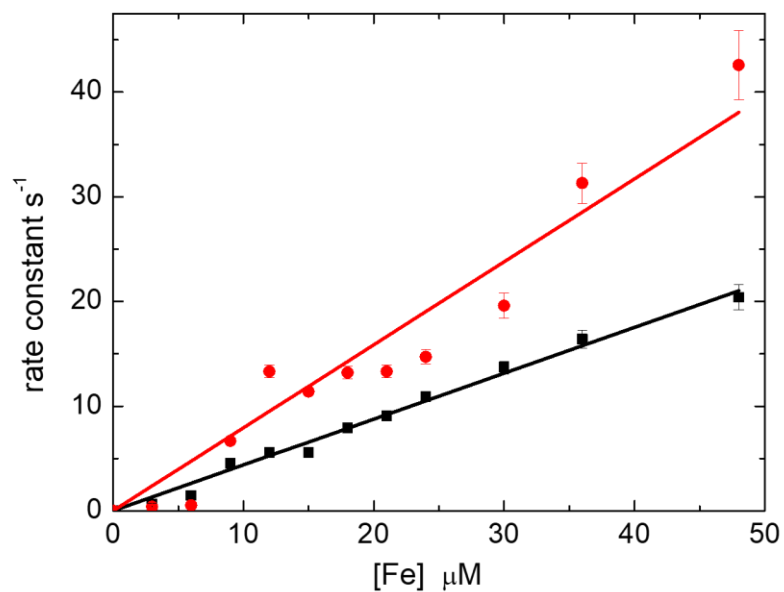

**Figure S5. Dependence of rapid Fe<sup>2+</sup> oxidation rate constant on Fe<sup>2+</sup> concentration.** Linear dependence of the rate constant describing rapid Fe<sup>2+</sup> oxidation catalysed by FtMt (black squares) and HuHF (red circles). Error bars are 3× the standard error estimated from least squares fitting of exponential functions through the data shown in Figure 4. Solid lines represent the best fit to a straight line through the origin.

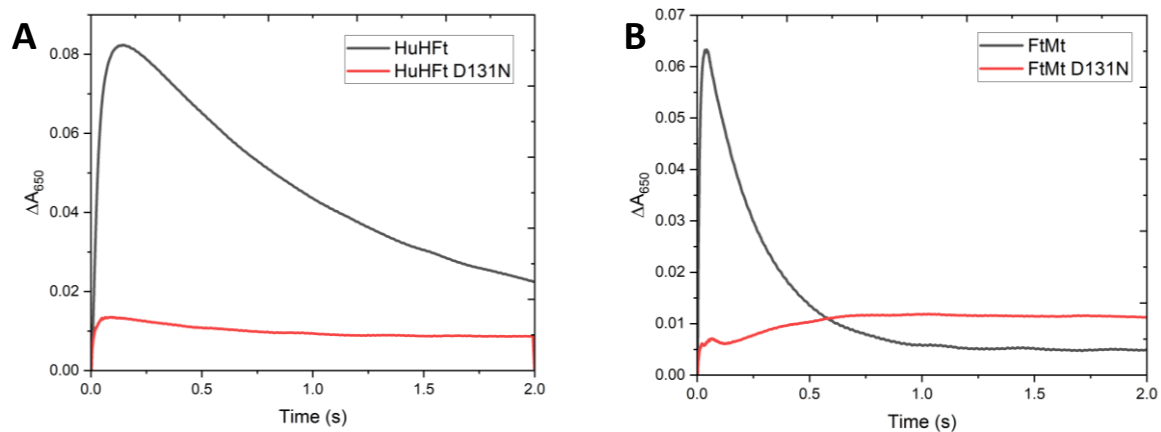

**Figure S6. DFP formation in HuHF, FtMt and D131N variants.** Absorbance at 650 nm as a function of time following the aerobic mixing of (A) wild-type or variant D131N HuHF, or (B) wild type or variant D131N FtMt with 48  $\text{Fe}^{2+}$  per cage. Transient absorbance at this wavelength in the wild-type but not the variant proteins indicates that the DFP intermediate accumulates in the former but not the latter.

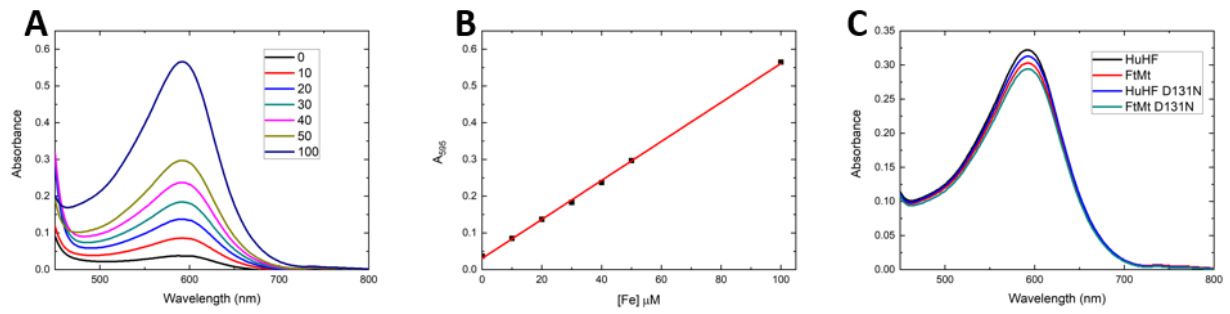

**Figure S7. Iron content of iron-loaded samples of HuHF, FtMt and respective D131N variants used in iron release assays. (A)** absorbance spectra of standard  $\text{Fe}^{2+}$  solutions treated equivalently to acid digested ferritin samples. **(B)** The linear relationship between 595 nm absorbance and  $\text{Fe}^{2+}$  concentration for the samples from (A). **(C)** Absorbance spectra of the complex between ferene and  $\text{Fe}^{2+}$  released during acid digestion of HuHF (black line), FtMt (red), HuHF D131N (blue) and FtMt D131N (cyan).

**Table S1.** High resolution data collection and refinement statistics.

| Sample name                    | HuHF 5 min O <sub>2</sub> soak | HuHF 20 min O <sub>2</sub> soak | D131N HuHF 5 min O <sub>2</sub> soak | D131N HuHF 20 min O <sub>2</sub> soak | FtMt 5 min O <sub>2</sub> soak | FtMt 20 min O <sub>2</sub> soak | D131N FtMt 5 min O <sub>2</sub> soak | D131N FtMt 20 min O <sub>2</sub> soak |
|--------------------------------|--------------------------------|---------------------------------|--------------------------------------|---------------------------------------|--------------------------------|---------------------------------|--------------------------------------|---------------------------------------|
| PDB entry code                 | 9I1C                           | 9I1B                            | 9I19                                 | 9I1E                                  | 9HYC                           | 9I1A                            | 9I1D                                 | 9I1F                                  |
| Beamline                       | DLS i24                        | DLS i24                         | DLS i24                              | DLS i24                               | DLS i24                        | DLS i24                         | DLS i24                              | DLS i24                               |
| Wavelength/ Å                  | 0.975                          | 0.975                           | 0.975                                | 0.975                                 | 0.975                          | 0.975                           | 0.975                                | 0.975                                 |
| Resolution range               | 41.98-1.582<br>(1.638-1.582)   | 54.93-1.63<br>(1.689-1.63)      | 42-1.631<br>(1.689-1.631)            | 55.37-1.76<br>(1.823-1.76)            | 55.15-1.711<br>(1.772-1.711)   | 55-1.73<br>(1.792-1.73)         | 40.88-1.651<br>(1.71-1.651)          | 27.55-1.72<br>(1.782-1.72)            |
| Space group                    | F 4 3 2                        | F 4 3 2                         | F 4 3 2                              | F 4 3 2                               | F 4 3 2                        | F 4 3 2                         | F 4 3 2                              | F 4 3 2                               |
| Unit cell                      | 182.98                         | 182.18                          | 183.09                               | 183.66                                | 182.90                         | 182.41                          | 182.83                               | 182.71                                |
| Total reflections              | 3041242<br>(5800)              | 3012019<br>(22137)              | 3051139<br>(22927)                   | 2991726<br>(81677)                    | 3006115<br>(61214)             | 2965400<br>(69394)              | 3020629<br>(31099)                   | 3004611<br>(62043)                    |
| Unique reflections             | 34509<br>(1931)                | 32168<br>(2694)                 | 32092<br>(2671)                      | 26854<br>(2582)                       | 28771<br>(2744)                | 27662<br>(2670)                 | 31209<br>(2646)                      | 28132<br>(2595)                       |
| Multiplicity                   | 88.1<br>(3.0)                  | 93.6<br>(8.2)                   | 95.1<br>(8.6)                        | 111.4<br>(31.6)                       | 104.5<br>(22.3)                | 107.2<br>(26)                   | 96.8<br>(11.8)                       | 106.8<br>(23.9)                       |
| Completeness (%)               | 94.82<br>(53.04)               | 97.97<br>(84.40)                | 96.24<br>(81.13)                     | 99.55<br>(95.54)                      | 99.35<br>(93.67)               | 99.41<br>(94.28)                | 97.14<br>(80.73)                     | 99.32<br>(94.09)                      |
| Mean I/sigma(I)                | 39.24<br>(0.69)                | 36.09<br>(0.87)                 | 29.19<br>(0.78)                      | 15.78<br>(0.51)                       | 22.32<br>(1.08)                | 17.83<br>(0.62)                 | 32.57<br>(0.84)                      | 51.21<br>(3.96)                       |
| Wilson B-factor                | 16.73                          | 20.32                           | 18.24                                | 28.75                                 | 22.52                          | 24.46                           | 21.27                                | 17                                    |
| R-merge                        | 0.1068<br>(0.9225)             | 0.1187<br>(1.436)               | 0.146<br>(1.624)                     | 0.3159<br>(6.765)                     | 0.2414<br>(4.602)              | 0.2461<br>(3.608)               | 0.1324<br>(1.882)                    | 0.1027<br>(0.6636)                    |
| R-meas                         | 0.1074<br>(1.141)              | 0.1193<br>(1.534)               | 0.1467<br>(1.725)                    | 0.3173<br>(6.876)                     | 0.2425<br>(4.704)              | 0.2472<br>(3.68)                | 0.133<br>(1.971)                     | 0.1031<br>(0.6779)                    |
| R-pim                          | 0.00984<br>1<br>(0.6435)       | 0.01079<br>(0.512)              | 0.0134<br>(0.5569)                   | 0.02865<br>(1.211)                    | 0.02218<br>(0.9268)            | 0.02226<br>(0.7017)             | 0.01204<br>(0.5565)                  | 0.00907<br>9<br>(0.1312)              |
| CC1/2                          | 1 (0.357)                      | 1<br>(0.423)                    | 0.999<br>(0.452)                     | 1<br>(0.399)                          | 1<br>(0.497)                   | 0.999<br>(0.396)                | 1<br>(0.456)                         | 1 (0.909)                             |
| CC*                            | 1 (0.725)                      | 1<br>(0.771)                    | 1<br>(0.789)                         | 1<br>(0.755)                          | 1<br>(0.815)                   | 1<br>(0.753)                    | 1<br>(0.791)                         | 1 (0.976)                             |
| Reflections used in refinement | 34464<br>(1891)                | 32155<br>(2684)                 | 32052<br>(2635)                      | 26755<br>(2486)                       | 28671<br>(2649)                | 27560<br>(2569)                 | 31098<br>(2535)                      | 28130<br>(2595)                       |
| Reflections used for R-free    | 1755<br>(99)                   | 1675<br>(129)                   | 1625<br>(134)                        | 1385<br>(132)                         | 1429<br>(137)                  | 1353<br>(119)                   | 1581<br>(121)                        | 1991<br>(183)                         |
| R-work                         | 0.1557<br>(0.3344)             | 0.1857<br>(0.3304)              | 0.1663<br>(0.3505)                   | 0.1585<br>(0.3489)                    | 0.1668<br>(0.2946)             | 0.1826<br>(0.3462)              | 0.1608<br>(0.3237)                   | 0.1647<br>(0.2119)                    |
| R-free                         | 0.1860<br>(0.3415)             | 0.2139<br>(0.3493)              | 0.1941<br>(0.3928)                   | 0.1904<br>(0.3649)                    | 0.1945<br>(0.3113)             | 0.2168<br>(0.3442)              | 0.1842<br>(0.3461)                   | 0.1886<br>(0.2627)                    |
| CC(work)                       | 0.967<br>(0.726)               | 0.944<br>(0.727)                | 0.965<br>(0.792)                     | 0.964<br>(0.734)                      | 0.956<br>(0.847)               | 0.949<br>(0.749)                | 0.955<br>(0.792)                     | 0.957<br>(0.914)                      |
| CC(free)                       | 0.951<br>(0.49)                | 0.914<br>(0.672)                | 0.953<br>(0.776)                     | 0.948<br>(0.687)                      | 0.948<br>(0.864)               | 0.937<br>(0.629)                | 0.952<br>(0.781)                     | 0.944<br>(0.873)                      |
| Number of non-hydrogen atoms   | 1766                           | 1560                            | 1709                                 | 1705                                  | 1619                           | 1556                            | 1607                                 | 1689                                  |
| macromolecules                 | 1436                           | 1334                            | 1424                                 | 1489                                  | 1383                           | 1363                            | 1392                                 | 1416                                  |
| ligands                        | 17                             | 10                              | 11                                   | 10                                    | 11                             | 14                              | 12                                   | 9                                     |

|                                    |       |       |       |       |       |       |       |       |
|------------------------------------|-------|-------|-------|-------|-------|-------|-------|-------|
| solvent                            | 313   | 216   | 274   | 206   | 225   | 179   | 203   | 264   |
| Number of protein residues         | 173   | 163   | 174   | 174   | 168   | 167   | 168   | 168   |
| RMS(bonds)                         | 0.006 | 0.011 | 0.006 | 0.01  | 0.007 | 0.007 | 0.01  | 0.006 |
| RMS(angles)                        | 0.88  | 1.09  | 1.1   | 1.1   | 0.98  | 0.94  | 1.13  | 0.96  |
| Ramachandran favored (%)           | 98.25 | 98.14 | 98.26 | 99.42 | 97.59 | 98.18 | 98.19 | 98.19 |
| Ramachandran allowed (%)           | 1.75  | 1.86  | 1.74  | 0.58  | 2.41  | 1.82  | 1.81  | 1.81  |
| Rotamer outliers (%)               | 0     | 0     | 0     | 0     | 0     | 0     | 0     | 0     |
| Clashscore                         | 1.41  | 14.83 | 3.21  | 2.36  | 3.69  | 2.24  | 3.29  | 5.38  |
| Average B-factor (Å <sup>2</sup> ) | 19.36 | 23.85 | 20.2  | 33.34 | 25.42 | 27.68 | 25.88 | 20.92 |
| macromolecules                     | 16.88 | 22.16 | 18.25 | 31.84 | 23.76 | 26.36 | 24.2  | 18.69 |
| ligands                            | 20.49 | 27.6  | 22.28 | 34.56 | 28.36 | 34.08 | 30.7  | 22.1  |
| solvent                            | 30.7  | 34.17 | 30.26 | 44.13 | 35.47 | 37.23 | 37.09 | 32.85 |

**Table S2.** Fe K $\alpha$  absorption edge data collection and refinement statistics.

|                                      | <b>HuHF 2<br/>min O<sub>2</sub><br/>soak</b> | <b>HuHF 20<br/>min O<sub>2</sub><br/>soak</b> | <b>HuHF<br/>D131N 2<br/>min O<sub>2</sub></b> | <b>HuHF<br/>D131N<br/>20 min<br/>O<sub>2</sub></b> | <b>FtMt 2<br/>min O<sub>2</sub></b> | <b>FtMt 20<br/>min O<sub>2</sub></b> | <b>FtMt<br/>D131N 2<br/>min O<sub>2</sub></b> | <b>FtMt<br/>D131N<br/>20 min<br/>O<sub>2</sub></b> |
|--------------------------------------|----------------------------------------------|-----------------------------------------------|-----------------------------------------------|----------------------------------------------------|-------------------------------------|--------------------------------------|-----------------------------------------------|----------------------------------------------------|
| Beamline                             | i24                                          | i24                                           | i24                                           | i24                                                | i24                                 | i24                                  | i24                                           | i24                                                |
| Wavelength/ Å                        | 1.74                                         | 1.74                                          | 1.74                                          | 1.74                                               | 1.74                                | 1.74                                 | 1.74                                          | 1.74                                               |
| Resolution range                     | 91.49 -<br>1.86<br>(1.89 -<br>1.86)          | 91.36 -<br>1.99 (2.02<br>- 1.99)              | 105.31 -<br>1.81<br>(1.84 -<br>1.81)          | 105.53 -<br>2.00<br>(2.03 -<br>2.00)               | 28.89 -<br>2.00<br>(2.04 -<br>2.00) | 91.33 -<br>1.98<br>(2.01 -<br>1.98)  | 105.89 -<br>1.98<br>(2.01 -<br>1.98)          | 91.61 -<br>1.87<br>(1.90 -<br>1.87)                |
| Total reflections                    | 1233576                                      | 2393826                                       | 1197855                                       | 1201743                                            | 1114978<br>(23190)                  | 1207548                              | 1158410                                       | 1177622                                            |
| Unique reflections                   | 23937                                        | 18514                                         | 23434                                         | 68499                                              | 18143<br>(890)                      | 18770                                | 19007                                         | 22174                                              |
| Multiplicity                         | 55.58<br>(6.87)                              | 129.30<br>(52.81)                             | 50.95<br>(2.53)                               | 17.54<br>(7.94)                                    | 61.5<br>(26.1)                      | 64.33<br>(24.67)                     | 60.95<br>(24.60)                              | 53.11<br>(8.56)                                    |
| Completeness (%)                     | 99.97<br>(99.46)                             | 100.00<br>(100.000)                           | 96.50<br>(53.60)                              | 99.41<br>(93.38)                                   | 99.97<br>(99.44)                    | 100<br>(100)                         | 100<br>(100)                                  | 99.27<br>(93.19)                                   |
| Anomalous multiplicity               | 30.26<br>(3.73)                              | 70.69                                         | 27.8                                          | 9.1                                                | 33.2                                | 35.17                                | 33.3                                          | 28.89<br>(4.56)                                    |
| Anomalous completeness (%)           | 99.65<br>(93.63)                             | 100                                           | 95.35                                         | 98.85                                              | 100                                 | 100                                  | 100                                           | 99.16                                              |
| <I>                                  | 6                                            | 11.8                                          | 4                                             | 2                                                  | 3                                   | 9.8                                  | 1                                             | 3                                                  |
| </sl>                                | 34.27                                        | 14.67                                         | 32.85                                         | 18.67                                              | 37.5                                | 18.27                                | 23.92                                         | 27.31                                              |
| Rmerge                               | 0.104                                        | 0.2937                                        | 0.101                                         | 0.4828                                             | 0.131                               | 0.22                                 | 0.1709                                        | 0.1239                                             |
| Rmeas                                | 0.104                                        | 0.295                                         | 0.102                                         | 0.322                                              | 0.132                               | 0.222                                | 0.175                                         | 0.126                                              |
| Rpim                                 | 0.018                                        | 0.025                                         | 0.013                                         | 0.054                                              | 0.016                               | 0.027                                | 0.022                                         | 0.022                                              |
| CC(1/2)                              | 0.9992                                       | 0.9992                                        | 0.9996                                        | 0.9958                                             | 1                                   | 0.999                                | 0.9995                                        | 0.9995                                             |
| CC(anom)                             | 0.364                                        | 0.64                                          | 0.366                                         | 0.206                                              | 0.313                               | 0.103                                | 0.219                                         | 0.315                                              |
| Anomalous signal resolution limit/ Å | 2.45                                         | 2.41                                          | 2.34                                          | 2.56                                               | 2.53                                | 3.64                                 | 3.32                                          | 2.57                                               |

**Table S3.** Iron oxidation at ferritin ferroxidase centres. Rate constants for Fe<sup>2+</sup> oxidation extracted from exponential fitting of the time dependence of  $\Delta A_{340}$  nm following aerobic mixing of ferritin at final concentration 0.5  $\mu$ M with Fe<sup>2+</sup> at the concentrations listed. Values in parentheses indicate the estimated uncertainty in the final significant figure. Oxidation in the first 4 s following mixing was not observed for D131N HuHF.

| [Fe]<br>( $\mu$ M) | Wild-type FtMt     |                    | D131N FtMt         |                    | Wild-type HuHF     |                    |
|--------------------|--------------------|--------------------|--------------------|--------------------|--------------------|--------------------|
|                    | $k_r$ ( $s^{-1}$ ) | $k_s$ ( $s^{-1}$ ) | $k_r$ ( $s^{-1}$ ) | $k_s$ ( $s^{-1}$ ) | $k_r$ ( $s^{-1}$ ) | $k_s$ ( $s^{-1}$ ) |
| 3                  | 0.63(1)            | -                  | -                  | -                  | 0.4(1)             | -                  |
| 6                  | 1.45(1)            | -                  | -                  | 0.29(3)            | 0.53(3)            | -                  |
| 9                  | 4.5(1)             | 0.70(3)            | -                  | 0.10(3)            | 6.7(1)             | 0.80(2)            |
| 12                 | 5.6(1)             | 0.70(2)            | -                  | 0.11(1)            | 13.3(2)            | 2.00(2)            |
| 15                 | 5.6(1)             | 0.70(2)            | -                  | 0.11(1)            | 11.4(1)            | 1.70(2)            |
| 18                 | 7.9(1)             | 0.70(2)            | -                  | 0.15(1)            | 13.2(2)            | 2.00(2)            |
| 21                 | 9.1(1)             | 0.60(2)            | -                  | 0.13(1)            | 13.3(2)            | 1.5(1)             |
| 24                 | 10.9(1)            | 0.50(1)            | -                  | 0.14(1)            | 14.7(3)            | 1.40(2)            |
| 30                 | 13.7(2)            | 0.50(1)            | -                  | 0.14(1)            | 19.6(4)            | 1.10(3)            |
| 36                 | 16.4(3)            | 0.60(1)            | -                  | 0.18(1)            | 31.3(6)            | 1.20(1)            |
| 48                 | 20.4(4)            | 0.60(1)            | -                  | 0.20(1)            | 42.6(1)            | 1.10(1)            |

**Table S4.** Rates of iron mineralisation deduced from the time dependence of  $\Delta A_{340}$  nm following aerobic mixing of 0.5  $\mu\text{M}$  ferritin with 400 equivalents of  $\text{Fe}^{2+}$  or iron release deduced from the time dependence of  $\Delta A_{563}$  nm following anaerobic addition of 100  $\mu\text{M}$  sodium dithionite to ferritin containing approximately 600  $\text{Fe}^{3+}$  per cage in the presence of ferrozine. Values in parentheses represent the estimated uncertainty in the final significant figure.

|                                                | Wild-type FtMt | D131N FtMt | Wild-type HuHF | D131N HuHF |
|------------------------------------------------|----------------|------------|----------------|------------|
| Mineralisation rate ( $\mu\text{M min}^{-1}$ ) | 60.0(6)        | 33.0(1)    | 135.0(3)       | 30.0(2)    |
| Release rate ( $\mu\text{M min}^{-1}$ )        | 23.6(7)        | 23.6(7)    | 32(3)          | 17(1)      |
